# Supplementary material for: High-quality cadmium stannate annealed in N2 atmosphere for low-cost thin film solar cell
Source: Royal Society of Chemistry journal article supplement (doi:10.1039/c7ra00394c), 2017-01-01
Supplement: c7ra00394c1.pdf [file c7ra00394c1.pdf]

## Appendix

Tab. I Electrical properties of as-deposited CTO films

| Deposition atmosphere       | Sample                                                   | A (388 nm)  | B (358 nm)  | C (172 nm)  | D (142 nm)  |
|-----------------------------|----------------------------------------------------------|-------------|-------------|-------------|-------------|
| 80% Ar + 20% O <sub>2</sub> | Sheet resistance ( $\times 10^4 \Omega/\square$ )        | 0.935       | 1.803       | 1.367       | 3.126       |
|                             | Resistivity ( $\Omega \text{ cm}$ )                      | 0.363       | 0.646       | 0.235       | 0.444       |
|                             | Carrier mobility ( $\text{cm}^2/\text{Vs}$ )             | 19.1        | 15.0        | 18.7        | 9.74        |
|                             | Carrier concentration ( $\times 10^{17} / \text{cm}^3$ ) | 9.00        | 6.43        | 14.21       | 14.44       |
| Ar                          | Sample                                                   | A' (627 nm) | B' (420 nm) | C' (210 nm) | D' (150 nm) |
|                             | Sheet resistance ( $\Omega/\square$ )                    | 9.769       | 16.24       | 33.48       | 51.03       |
|                             | Resistivity ( $\times 10^{-4} \Omega \text{ cm}$ )       | 6.14        | 6.66        | 7.03        | 7.65        |
|                             | Carrier mobility ( $\text{cm}^2/\text{Vs}$ )             | 26.4        | 37.6        | 24.4        | 19.2        |
|                             | Carrier concentration ( $\times 10^{20} / \text{cm}^3$ ) | 3.854       | 2.495       | 3.640       | 4.244       |

Tab. II Electrical properties of CTO films annealed at 560°C

| Deposition atmosphere       | Sample                                                   | A (388 nm)  | B (358 nm)  | C (172 nm)  | D (142 nm)  |
|-----------------------------|----------------------------------------------------------|-------------|-------------|-------------|-------------|
| 80% Ar + 20% O <sub>2</sub> | Sheet resistance ( $\Omega/\square$ )                    | 113.5       | 48.34       | 26.05       | 28.93       |
|                             | Resistivity ( $\times 10^{-4} \Omega \text{ cm}$ )       | 44          | 17.3        | 4.48        | 4.49        |
|                             | Carrier mobility ( $\text{cm}^2/\text{Vs}$ )             | 14.8        | 21          | 36          | 39.3        |
|                             | Carrier concentration ( $\times 10^{20} / \text{cm}^3$ ) | 0.958       | 1.718       | 3.867       | 3.544       |
| Ar                          | Sample                                                   | A' (627 nm) | B' (420 nm) | C' (210 nm) | D' (150 nm) |
|                             | Sheet resistance ( $\Omega/\square$ )                    | 3047        | 321         | 24.55       | 34.35       |
|                             | Resistivity ( $\times 10^{-4} \Omega \text{ cm}$ )       | 191         | 13.5        | 5.16        | 5.15        |
|                             | Carrier mobility ( $\text{cm}^2/\text{Vs}$ )             | 0.149       | 1.16        | 51          | 43          |
|                             | Carrier concentration ( $\times 10^{20} / \text{cm}^3$ ) | 2.197       | 3.987       | 2.372       | 2.819       |

Tab. III Electrical properties of CTO films annealed at 580°C

| Deposition atmosphere       | Sample                                                  | A (388 nm)  | B (358 nm)  | C (172 nm)  | D (142 nm)  |
|-----------------------------|---------------------------------------------------------|-------------|-------------|-------------|-------------|
| 80% Ar + 20% O <sub>2</sub> | Sheet resistance ( $\Omega/\square$ )                   | 32.85       | 31.56       | 23.38       | 26.59       |
|                             | Resistivity ( $\times 10^{-4} \Omega \text{ cm}$ )      | 12.75       | 11.3        | 4.02        | 4.12        |
|                             | Carrier mobility ( $\text{cm}^2/\text{Vs}$ )            | 31          | 31.8        | 30.2        | 33.3        |
|                             | Carrier concentration ( $\times 10^{20} /\text{cm}^3$ ) | 1.581       | 1.734       | 5.145       | 4.545       |
| Ar                          | Sample                                                  | A' (627 nm) | B' (420 nm) | C' (210 nm) | D' (150 nm) |
|                             | Sheet resistance ( $\Omega/\square$ )                   | 1659        | 437.2       | 37.11       | 53.46       |
|                             | Resistivity ( $\times 10^{-4} \Omega \text{ cm}$ )      | 104         | 18.4        | 7.79        | 8.01        |
|                             | Carrier mobility ( $\text{cm}^2/\text{Vs}$ )            | 0.14        | 1.57        | 43.1        | 27.6        |
|                             | Carrier concentration ( $\times 10^{20} /\text{cm}^3$ ) | 4.273       | 2.171       | 1.860       | 2.823       |

Tab. IV Electrical properties of CTO films annealed at 600°C

| Deposition atmosphere       | Sample                                                  | A (388 nm)  | B (358 nm)  | C (172 nm)  | D (142 nm)  |
|-----------------------------|---------------------------------------------------------|-------------|-------------|-------------|-------------|
| 80% Ar + 20% O <sub>2</sub> | Sheet resistance ( $\Omega/\square$ )                   | 9.15        | 8.56        | 19.24       | 18.77       |
|                             | Resistivity ( $\times 10^{-4} \Omega \text{ cm}$ )      | 3.55        | 3.07        | 3.31        | 2.67        |
|                             | Carrier mobility ( $\text{cm}^2/\text{Vs}$ )            | 37.6        | 45.5        | 32.9        | 37.7        |
|                             | Carrier concentration ( $\times 10^{20} /\text{cm}^3$ ) | 4.683       | 4.485       | 5.738       | 6.219       |
| Ar                          | Sample                                                  | A' (627 nm) | B' (420 nm) | C' (210 nm) | D' (150 nm) |
|                             | Sheet resistance ( $\Omega/\square$ )                   | 415.8       | 571.5       | 33.84       | 53.32       |
|                             | Resistivity ( $\times 10^{-4} \Omega \text{ cm}$ )      | 261         | 240         | 7.11        | 8.00        |
|                             | Carrier mobility ( $\text{cm}^2/\text{Vs}$ )            | 0.971       | 1.62        | 51.1        | 46.6        |
|                             | Carrier concentration ( $\times 10^{20} /\text{cm}^3$ ) | 2.465       | 1.606       | 1.717       | 1.673       |

Tab. V Electrical properties of CTO films annealed at 620°C

| Deposition atmosphere | Sample | A (388 nm) | B (358 nm) | C (172 nm) | D (142 nm) |
|-----------------------|--------|------------|------------|------------|------------|
|-----------------------|--------|------------|------------|------------|------------|

|                                |                                                          |             |             |             |             |
|--------------------------------|----------------------------------------------------------|-------------|-------------|-------------|-------------|
| 80% Ar +<br>20% O <sub>2</sub> | Sheet resistance ( $\Omega/\square$ )                    | 5.07        | 5.34        | 10.90       | 12.21       |
|                                | Resistivity ( $\times 10^{-4} \Omega \text{ cm}$ )       | 1.97        | 1.91        | 1.88        | 1.73        |
|                                | Carrier mobility ( $\text{cm}^2/\text{Vs}$ )             | 41.6        | 49.7        | 44.3        | 43.7        |
|                                | Carrier concentration ( $\times 10^{20} / \text{cm}^3$ ) | 7.616       | 6.596       | 7.516       | 8.245       |
| Ar                             | Sample                                                   | A' (627 nm) | B' (420 nm) | C' (210 nm) | D' (150 nm) |
|                                | Sheet resistance ( $\Omega/\square$ )                    | 487         | 534         | 68.29       | 28.79       |
|                                | Resistivity ( $\times 10^{-4} \Omega \text{ cm}$ )       | 305         | 225         | 14.3        | 7.32        |
|                                | Carrier mobility ( $\text{cm}^2/\text{Vs}$ )             | 1.29        | 2.36        | 22.8        | 45.2        |
|                                | Carrier concentration ( $\times 10^{20} / \text{cm}^3$ ) | 1.852       | 1.178       | 1.913       | 1.887       |

Tab. VI Electrical properties of CTO films annealed at 635°C

| Deposition atmosphere          | Sample                                                   | A (388 nm)  | B (358 nm)  | C (172 nm)  | D (142 nm)  |
|--------------------------------|----------------------------------------------------------|-------------|-------------|-------------|-------------|
| 80% Ar +<br>20% O <sub>2</sub> | Sheet resistance ( $\Omega/\square$ )                    | 9.08        | 8.542       | 15.8        | 14.87       |
|                                | Resistivity ( $\times 10^{-4} \Omega \text{ cm}$ )       | 3.52        | 3.06        | 2.59        | 2.11        |
|                                | Carrier mobility ( $\text{cm}^2/\text{Vs}$ )             | 41.2        | 38.9        | 40.9        | 38.7        |
|                                | Carrier concentration ( $\times 10^{20} / \text{cm}^3$ ) | 4.302       | 5.248       | 5.876       | 7.638       |
| Ar                             | Sample                                                   | A' (627 nm) | B' (420 nm) | C' (210 nm) | D' (150 nm) |
|                                | Sheet resistance ( $\Omega/\square$ )                    | 705.5       | 1321        | 32.69       | 46.43       |
|                                | Resistivity ( $\times 10^{-4} \Omega \text{ m}$ )        | 443         | 555         | 6.87        | 6.96        |
|                                | Carrier mobility ( $\text{cm}^2/\text{Vs}$ )             | 0.77        | 0.63        | 43.0        | 40.2        |
|                                | Carrier concentration ( $\times 10^{20} / \text{cm}^3$ ) | 1.831       | 1.780       | 2.133       | 2.232       |

Tab. VII Some annealing research works about CTO

| Deposition atmosphere and target        | Anneal atmosphere | Anneal temperature and time | Resistivity $\rho$ (lowest), carrier mobility $\mu$ , and carrier concentration $n$ .    | Reference |
|-----------------------------------------|-------------------|-----------------------------|------------------------------------------------------------------------------------------|-----------|
| Ar/O <sub>2</sub> , Cd-Sn alloy target. | Ar                | 400-500°C , 40 min.         | $\rho = \sim 10^{-4} \Omega \text{ cm}$                                                  | [3]       |
| Ar/O <sub>2</sub> , Cd-Sn alloy target. | Ar                | 500°C , 2 hour.             | $\rho = 1.74 \times 10^{-4} \Omega \text{ cm}$ , $n = 4.46 \times 10^{20} / \text{cm}^3$ | [4]       |

|                                                                      |                       |                         |                                                                                                                                 |           |
|----------------------------------------------------------------------|-----------------------|-------------------------|---------------------------------------------------------------------------------------------------------------------------------|-----------|
| Ar/O <sub>2</sub> , Cd <sub>2</sub> SnO <sub>4</sub> ceramic target. | Ar/CdS                | 600-700°C , 10 min.     | $\rho = 1.54 \times 10^{-4} \Omega \text{ cm}$ , $n = \sim 10^{21} / \text{cm}^3$                                               | [5]       |
| O <sub>2</sub> , Cd <sub>2</sub> SnO <sub>4</sub> , ceramic target.  | Ar, Ar/CdS            | 580-700°C ,10-30 min.   | $\rho = 1.28 \times 10^{-4} \Omega \text{ cm}$ , $n = 8.94 \times 10^{20} / \text{cm}^3$ , $\mu = 54.5 (\text{cm}^2/\text{Vs})$ | [7]       |
| Ar/O <sub>2</sub> , ceramic target.                                  | Ar/CdS                | 450-700°C , 30 min.     | $P = 1.6 \times 10^{-4} \Omega \text{ cm}$ , $n = 7.4 \times 10^{20} / \text{cm}^3$ , $\mu = 52 (\text{cm}^2/\text{Vs})$        | [8]       |
| Ar, (cosputtering) CdO target and SnO <sub>2</sub> target.           | He, H <sub>2</sub>    | 500-700°C , 20 min.     | $P = 2.01 \times 10^{-4} \Omega \text{ cm}$ , $n = 5.8 \times 10^{20} / \text{cm}^3$ , $\mu = 29.2. (\text{cm}^2/\text{Vs})$    | [9]       |
| Ar/O <sub>2</sub> , ceramic target.                                  | Air                   | 600°C , 30 min.         | $\rho = \sim 6.6 \times 10^{-2} \Omega \text{ cm}$                                                                              | [10]      |
| Ar/O <sub>2</sub> , ceramic target.                                  | He/CdS (low pressure) | 650°C , 700°C , 15 min. | $\rho = 1.9 \times 10^{-4} \Omega \text{ cm}$ , $n = 5.9 \times 10^{20} / \text{cm}^3$ , $\mu = 54 (\text{cm}^2/\text{Vs})$     | [11]      |
| Ar/O <sub>2</sub> , ceramic target.                                  | CdS                   | 600°C , 1 hour.         | $\rho = 2.8 \times 10^{-4} \Omega \text{ cm}$ , $n = 5.5 \times 10^{20} / \text{cm}^3$ , $\mu = 40 (\text{cm}^2/\text{Vs})$     | [12]      |
| N <sub>2</sub>                                                       | 620                   | 620°C, 30 min.          | $\rho = 1.73 \times 10^{-4} \Omega \text{ cm}$ , $n = 8.2 \times 10^{20} / \text{cm}^3$ , $\mu = 43.7 (\text{cm}^2/\text{Vs})$  | This work |

Tab. VIII Electrical properties of CTO films after both 1<sup>st</sup> N<sub>2</sub> annealing and 2<sup>nd</sup> chloride treatment

| Sample     | N <sub>2</sub> gas annealing temperature (°C )           | 560   | 580    | 600   | 620   | 635   |
|------------|----------------------------------------------------------|-------|--------|-------|-------|-------|
| A (388 nm) | Sheet resistance ( $\Omega/\square$ )                    | 225.5 | 354.3  | 9.59  | 8.43  | 10.72 |
|            | Resistivity ( $\times 10^{-4} \Omega \text{ cm}$ )       | 87.5  | 137.5  | 3.72  | 3.27  | 4.16  |
|            | Carrier mobility ( $\text{cm}^2/\text{Vs}$ )             | 6.1   | 5.85   | 40.9  | 49.9  | 38.4  |
|            | Carrier concentration ( $\times 10^{20} / \text{cm}^3$ ) | 1.169 | 1.776  | 4.095 | 3.822 | 3.528 |
| C (172 nm) | N <sub>2</sub> gas annealing temperature (°C )           | 560   | 580    | 600   | 620   | 635   |
|            | Sheet resistance ( $\Omega/\square$ )                    | 41.16 | 1021.9 | 14.83 | 12.67 | 17.73 |
|            | Resistivity ( $\times 10^{-4} \Omega \text{ m}$ )        | 7.08  | 175.8  | 2.55  | 2.18  | 3.05  |

|  |                                                                 |      |       |       |      |       |
|--|-----------------------------------------------------------------|------|-------|-------|------|-------|
|  | Carrier mobility (cm <sup>2</sup> /Vs)                          | 31.9 | 6.56  | 48.2  | 59.7 | 37    |
|  | Carrier concentration (×<br>10 <sup>20</sup> /cm <sup>3</sup> ) | 2.76 | 0.541 | 5.081 | 4.79 | 5.546 |
